# Supplementary material for: Reprimo tissue-specific expression pattern is conserved between zebrafish and human
Source: PLOS journal article supplement (doi:10.1371/journal.pone.0178274), 2017-05-31
Supplement: S1 (10.1371/journal.pone.0178274.s001) [file journal.pone.0178274.s001]

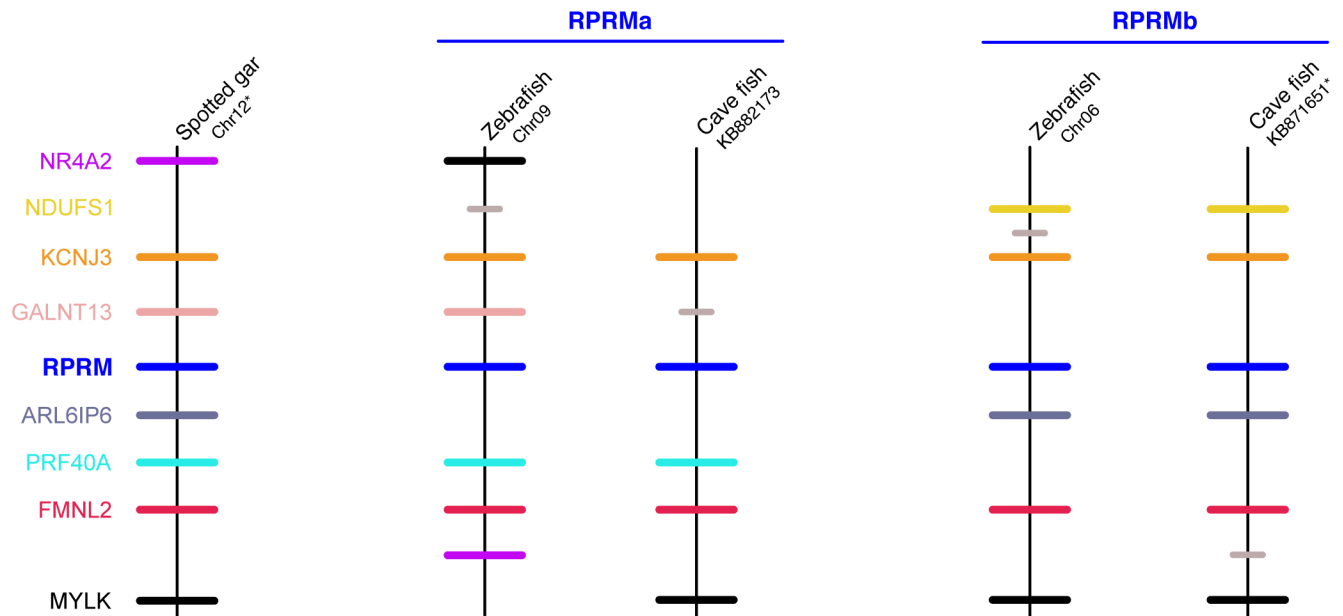

Figure. S1
